# Supplementary material for: Longitudinal Stability of Intellectual Functioning in Autism Spectrum Disorder: From Age 3 Through Mid-adulthood
Source: J Autism Dev Disord. 2021 Oct 22;52(10):4490–504. doi: 10.1007/s10803-021-05227-x (PMC9090201; doi:10.1007/s10803-021-05227-x)
Supplement: Supplementary file 2 — Supplementary file2 (XLSX 14 kb) [file 10803_2021_5227_MOESM2_ESM.xlsx]

## Sheet: Sheet1
Supplementary Table.
Intelligence Scores Summarized by Test Version for the ASD and TDC Participants
Age at FSIQ Test
	ASD n=119						TDC n=128
	n	mean	sd	min	max		n	mean	sd	min	max
Mullen	1	3.33	na	3.33	3.33		0
DAS Preschool	17	4.51	0.89	3.1	6		3	3.92	0.22	3.67	4.08
DAS School	42	10.7	2.88	6.08	15.83		26	10.87	2.88	5.17	16.25
WISC-III	36	11.16	3.03	6.25	16.25		10	9.89	2.08	6.83	12.3
WASI	175	19.73	8.42	5.5	42.5		95	19.15	7.12	7.42	36.5
WAIS-III	134	25.51	6.74	15.6	46.4		88	25.69	5.54	16.17	39.75
WAIS-IV	31	24.14	6.87	17.33	44.9		0
Intelligence Scores
FSIQ	ASD n=119						TDC n=128
	n	mean	sd	min	max		n	mean	sd	min	max
Mullen	1	72	na	72	72		0
DAS Preschool	17	73.82	15.22	49	101		3	119.67	6.03	114	126
DAS School	42	96.98	19.26	64	134		26	118.12	15.48	95	153
WISC-III	36	99.22	19.2	61	131		10	104.4	11.41	78	117
WASI	175	101.29	15.78	65	136		95	118.14	11.65	87	144
WAIS-III	134	104.01	17.94	60	150		88	119.84	13.22	89	152
WAIS-IV	31	103.77	20.65	53	138		0
NVIQ or PIQ	ASD n=118						TDC n=128
	n	mean	sd	min	max		n	mean	sd	min	max
DAS Preschool	17	83.53	22.66	50	128		3	115	6.56	108	121
DAS School	42	98.62	17.66	67	135		26	117.62	15.6	94	145
WISC-III	35	99.17	18	66	135		10	100.7	11.63	77	116
WASI	104	104.88	16.36	72	138		62	117.73	12.16	87	138
WAIS III	134	103.5	16.71	67	150		88	117.26	14.19	90	155
WAIS IV	31	108.42	20.6	63	142		0
VIQ	ASD n=116						TDC n=128
	n	mean	sd	min	max		n	mean	sd	min	max
DAS Preschool	11	70	12.39	54	98		3	118.33	8.39	113	128
DAS School	42	94.43	21.97	51	145		26	113.31	13.81	94	151
WISC-III	35	99.26	22.82	58	138		10	107.1	14.39	84	135
WASI	104	94.52	17.6	55	130		62	113.82	12.95	74	149
WAIS-III	134	103.62	19.01	58	142		88	118.76	12.64	89	144
WAIS-IV	31	111.74	22.94	58	145		0
VCI	ASD n=106						TDC n=96
	n	mean	sd	min	max		n	mean	sd	min	max
WISC-III	35	99.57	21.32	63	136		10	107.1	13.27	87	131
WAIS-III	134	109.52	18.71	61	150		88	119.02	10.88	91	142
WAIS-IV	31	111.74	22.94	58	145		0
POI	ASD n=106						TDC n=96
	n	mean	sd	min	max		n	mean	sd	min	max
WISC-III	35	105	18.83	69	135		10	102.6	11.35	80	119
WAIS-III	134	109.93	18.74	67	150		88	120.34	14.77	84	150
WAIS-IV	31	108.42	20.6	63	142		0
WMI	ASD n=103						TDC n=92
	n	mean	sd	min	max		n	mean	sd	min	max
WISC-III	27	97.81	24.57	52	140		9	103.67	15.36	84	124
WAIS-III	127	95.6	19.99	51	147		85	111.18	16.03	78	147
WAIS-IV	31	98.61	18.55	63	139		0
PSI	ASD n=107						TDC n=121
	n	mean	sd	min	max		n	mean	sd	min	max
WISC-III	54	88.59	16.87	50	124		29	107.69	12.01	83	129
WAIS-III	204	89.8	15.2	60	131		135	108.46	13.3	79	134
WAIS-IV	30	88.37	13.06	63	114		0
